# Supplementary material for: Significant improvement of photocatalytic hydrogen evolution performance in covalent organic frameworks: substituent fine-tuning
Source: Royal Society of Chemistry journal article supplement (doi:10.1039/d4ta00478g), 2024-01-01
Supplement: d4ta00478g1.pdf [file d4ta00478g1.pdf]

## Supplementary Information

### **Significant Improvement of Photocatalytic Hydrogen Evolution Performance in Covalent Organic Frameworks: Substituent Fine-Tuning**

Shaodong Jiang<sup>1,2</sup>, Hongyun Niu<sup>1</sup>, Qing Sun<sup>3</sup>, Rusong Zhao<sup>4</sup>, Na Li<sup>4</sup>, Yaqi Cai<sup>1,2,5\*</sup>

State Key Laboratory of Environmental Chemistry and Ecotoxicology, Research  
Center for Eco-Environmental Sciences, Chinese Academy of Sciences, Beijing  
100085, P.R.China.

University of Chinese Academy of Sciences, Beijing100049, P. R. China.

School of Environment, Hangzhou Institute for Advanced Study, University of  
Chinese Academy of Sciences, Hangzhou 310024, P. R. China.

Xiangnan University, NanLing Research Institute for Modern Seed Industry,  
Chenzhou 423000, P.R.China.

Qilu University of Technology (Shandong Academy of Sciences), Shandong Analysis  
and Test Center, Key Laboratory for Applied Technology of Sophisticated Analytical  
Instruments of Shandong Province, Jinan 250014, China.

Text: 4

Table: 3

Figure: 5

## **Text S1. Regents and materials**

All reagents and solvents were purchased from commercial sources and used without further purification. 2,4,6-trihydroxybenzene-1,3,5-tricarbaldehyde, 1,4-diamino-2,5-dicyanobenzene, 2,5-dichlorobenzene-1,4-diamine were purchased from Jilin Chinese Academy of Sciences - Yanshen Technology Co., Ltd. 2,5-dichlorobenzene-1,4-diamine, p-Phenylenediamine, Tetrahydrofuran (THF), 1,4-dioxane, mesitylene and Chloroplatinic acid hexahydrate were purchased from J&K Chemical Co. Ltd. Glacial acetic acid and 2,3,5,6-tetrafluorobenzene-1,4-diamine were purchased from Shanghai Macklin Biochemical Co., Ltd. Methanol, ascorbic acid and ethanol were obtained from Sinopharm Chemistry Reagent Co. Ltd. 2,5-Diaminotoluene was obtained from Shanghai Aladdin Bio-Chem Technology Co., Ltd.

## **Text S2. Characterization**

Powder X-ray diffraction (PXRD, Bruker D8 ADVANCE, Germany) using a Cu K $\alpha$  ( $\lambda = 1.54056 \text{ \AA}$ ) radiation ranging from  $2^\circ$  to  $40^\circ$  with a resolution of  $0.02^\circ$  was utilized to analysis the crystalline. Surface area and pore volume were measured by Brunauer-Emmette-Teller (BET) methods (ASAP2000 V3.01 A; Micromeritics, Norcross, GA).

All the electrochemical properties were investigated on a CHI760E electrochemical analyzer (Chenhua, Shanghai, China) in a standard Three-electrode system, using a platinum foil as counter electrode and Saturated Calomel Electrode (SCE) as the reference electrode. The electrolyte was a 0.1 mol/L Na<sub>2</sub>SO<sub>4</sub> aqueous solution. The working electrodes were prepared as follows: 5 mg of photocatalyst powder was dispersed in 0.15 ml of ethanol, and 0.05 ml Nafion was added as the adhesive, which was dip-coated on the surface of indium tin oxide (ITO) glass substrate and dried at room temperature. The light source was preheated for 10 min before each photocurrent test to maintain a stable light intensity. Mott-schottky curves were measured at a frequency of 1 kHz.

## **Text S3. Preparation of TpPa-X**

COF TpPa-1: Following is a modified procedure<sup>[1]</sup>, a quartz tube measuring 10 × 8 mm (o.d. × i.d.) was charged with 1,3,5-triformylphloroglucinol (Tp) (63 mg, 0.3 mmol), 1,4-phenylenediamine (Pa-1) (48 mg, 0.45 mmol), 1.5 ml of dioxane, 1.5 ml of mesitylene, and 0.3 ml of 6 M aqueous acetic acid (The exact amount to be added can be found in Table S1). The tube was flash frozen at 77 K in liquid N<sub>2</sub> bath, degassed by three freeze-pump-thaw cycles, and flame sealed. The reaction was heated at 120 °C for 5 d, yielding a red precipitate at the bottom of the tube. The powder was isolated by centrifugation and washed with THF (20 × 3) and MeOH (20 × 2), and dried at room temperature and evacuated under vacuum at 100 °C, 6h to afford a red powder.

## **Text S4. Photocatalytic hydrogen evolution**

50 mL of 0.1 M ascorbic acid aqueous solution was added into the photocatalytic hydrogen evolution vessel and 10 mg COF powder was dispersed into the system. A

certain amount of  $\text{H}_2\text{PtCl}_6 \cdot 6\text{H}_2\text{O}$  (3% wt Pt relative to the amount of catalyst COF) was added as the precursor of co-catalyst Pt. The container containing the suspension is connected to the photocatalytic hydrogen evolution system (CEL-PAEM-D6, CEAULIGHT). Vacuum the reaction mixture for half an hour to ensure complete removal of air from the unit and check the air tightness of the system. It is then illuminated with a 300 W Xe light source with an optical cut-off filter ( $\lambda \geq 420$  nm). The temperature of the reaction solution is maintained at 5 °C by circulating the cooling water. After 1, 2, 3, and 4 hours of illumination, the volume of hydrogen precipitated was measured by a gas chromatographic analyzer equipped with a thermal conductivity detector (TCD), and the amount of hydrogen produced was determined by a standard curve.

**Table S1.** Amounts of monomers used to synthesize COFs. Where M is mesitylene and D is dioxane.

| COF                                  | Tp/mg | Pa-X/mg | Solvent (M :D) | Catalyst        | Product/ mg | Yield (%) |
|--------------------------------------|-------|---------|----------------|-----------------|-------------|-----------|
| TpPa-1                               | 63    | 48      | 1: 1           | 0.3 ml 6 M AcOH | 101         | 91        |
| TpPa-CN <sub>2</sub>                 |       | 60      | 3: 1           |                 | 110         | 89        |
| TpPa-Cl <sub>2</sub>                 |       | 80      | 1: 3           |                 | 124         | 87        |
| TpPa-CH <sub>3</sub>                 |       | 55      | 3: 1           |                 | 109         | 92        |
| TpPa-(CH <sub>3</sub> ) <sub>2</sub> |       | 62      | 1: 1           |                 | 112         | 90        |
| TpPa-CN                              |       | 60      | 1: 3           |                 | 111         | 90        |

**Table S2.** Time-resolved fluorescence fit results.

| Sample                               | $\tau_1$              | $\tau_2$              | B <sub>1</sub> | B <sub>2</sub> | $\tau$                |
|--------------------------------------|-----------------------|-----------------------|----------------|----------------|-----------------------|
| TpPa-1                               | 4.26*10 <sup>-9</sup> | 4.25*10 <sup>-9</sup> | 1.65           | 0.81           | 4.26*10 <sup>-9</sup> |
| TpPa-Cl <sub>2</sub>                 | 1.98*10 <sup>-9</sup> | 1.98*10 <sup>-9</sup> | 0.53           | 1.98           | 1.98*10 <sup>-9</sup> |
| TpPa-CN <sub>2</sub>                 | 2.53*10 <sup>-9</sup> | 2.53*10 <sup>-9</sup> | 1.29           | 0.85           | 2.53*10 <sup>-9</sup> |
| TpPa-CN                              | 2.18*10 <sup>-9</sup> |                       | 54.24          |                | 2.18*10 <sup>-9</sup> |
| TpPa-CH <sub>3</sub>                 | 2.28*10 <sup>-9</sup> |                       | 2.01           |                | 2.28*10 <sup>-9</sup> |
| TpPa-(CH <sub>3</sub> ) <sub>2</sub> | 3.10*10 <sup>-9</sup> |                       | 2.10           |                | 3.10*10 <sup>-9</sup> |

The data was fitted with using multiple exponential formulas (1). And the average decay time  $\tau$  was calculated by the formula (2).

$$R(t) = B_1 e^{-\frac{t}{\tau_1}} + B_2 e^{-\frac{t}{\tau_2}} + B_3 e^{-\frac{t}{\tau_3}} \quad (1)$$

$$\tau = \frac{B_1 \times \tau_1^2 + B_2 \times \tau_2^2 + B_3 \times \tau_3^2}{B_1 \times \tau_1 + B_2 \times \tau_2 + B_3 \times \tau_3} \quad (2)$$

**Table S3.** Comparison of photocatalytic hydrogen evolution performances of TpPa-Cl<sub>2</sub> and TpPa-CN<sub>2</sub> with representative COFs and COF-based composites.

| Photocatalyst        | $\lambda$ (nm) | Sacrificial reagent | HER ( $\mu\text{mol g}^{-1} \text{h}^{-1}$ ) | Ref                                         |
|----------------------|----------------|---------------------|----------------------------------------------|---------------------------------------------|
| TpPa-Cl <sub>2</sub> | > 420          | AA                  | 99230                                        | This work                                   |
| TpPa-CN <sub>2</sub> | > 420          | AA                  | 76930                                        |                                             |
| CYANO-COF            | > 420          | AA                  | 60850                                        | Nat. Commun., 2022, 13, 2357                |
| CYANO-CON            | > 420          | AA                  | 134200                                       |                                             |
| Cu-sulphen-HDCOF-NS  | > 420          | Triethanolamine     | 36900                                        | J. Mater. Chem. A, 2020, 8, 25094           |
| TtaTfa_AC            | > 420          | AA                  | 20700                                        | Angew. Chem. Int. Ed., 2021, 60, 19797      |
| TpaTfa_AC            | > 420          | AA                  | 14900                                        |                                             |
| TtaTpa_AC            | > 420          | AA                  | 10800                                        |                                             |
| NKCOF-113 M          | > 420          | TEOA                | 13100                                        | Adv. Sci., 2022, 2203832                    |
| COF-JLU100           | > 420          | TEOA                | 107380                                       | Angew. Chem. Int. Ed., 2022, 61, e202208919 |

|                                                        |       |                     |        |                                                |
|--------------------------------------------------------|-------|---------------------|--------|------------------------------------------------|
| COF-JLU35                                              | > 420 | AA                  | 70800  | J. Am. Chem. Soc., 2023,<br>145, 8364 8374     |
| COF-JLU36                                              | > 420 | AA                  | 23600  |                                                |
| PY-DHBD-COF                                            | > 420 | AA                  | 71160  | Nat. Comm., 2022, 13, 1355                     |
| Ni-Py-COF                                              | > 420 | AA                  | 13231  | Angew. Chem. Int. Ed., 2022,<br>61, e202204326 |
| [Mo <sub>3</sub> S <sub>13</sub> ] @ZnP-<br>Pz-PEO-COF | > 420 | Lactic acid         | 11000  | Nat. Commun., 2023, 14, 329                    |
| Tp-2C/BPy <sup>2-</sup> -<br>COF                       | > 420 | AA                  | 34600  | Angew. Chem. Int. Ed., 2021,<br>60, 9642 9649  |
| Tz-COF-3                                               | > 420 | AA                  | 43200  | ACS Catal., 2022, 12, 9494<br>9502             |
| Pt@TpBpy-NS                                            | > 420 | Sodium<br>ascorbate | 22666  | Nat. Commun., 2023, 14, 593                    |
| FOO-COF                                                | > 420 | AA                  | 119100 | Appl. Catal., B., 2023, 330,<br>122581         |
| BTT-BPy-<br>PCOF(AC)                                   | > 420 | AA                  | 21200  | Angew. Chem. Int. Ed., 2023,<br>62, e202300224 |

TpPa-1

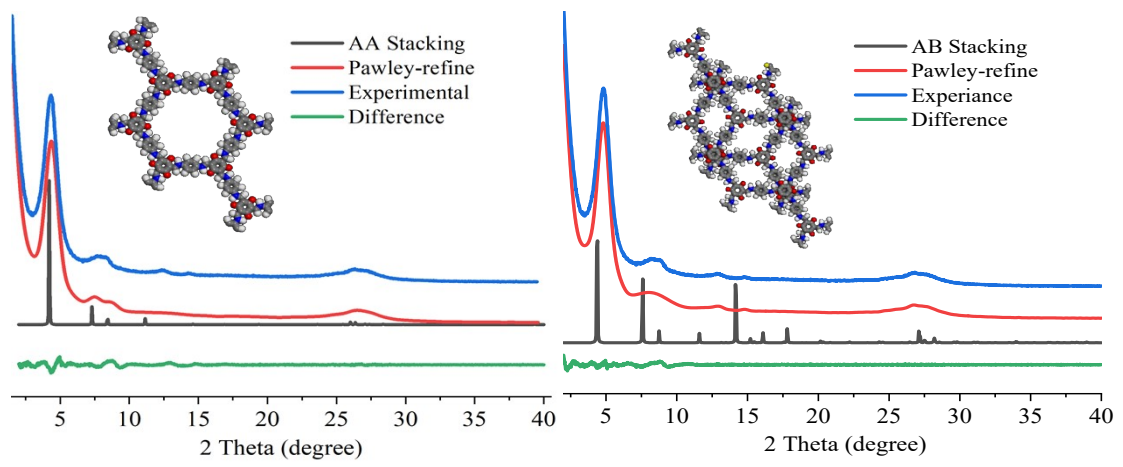

TpPa-Cl<sub>2</sub>

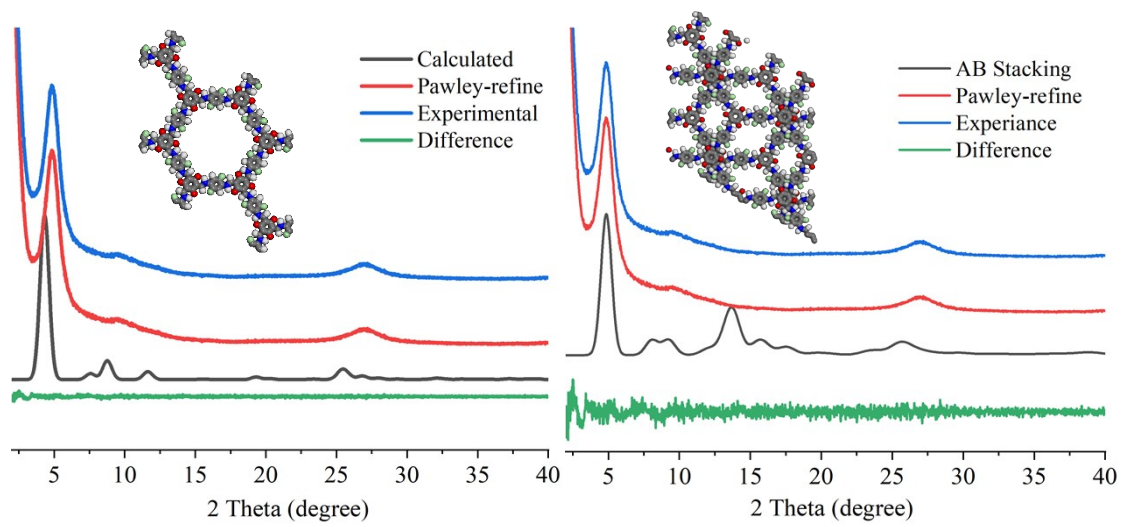

TpPa-CN<sub>2</sub>

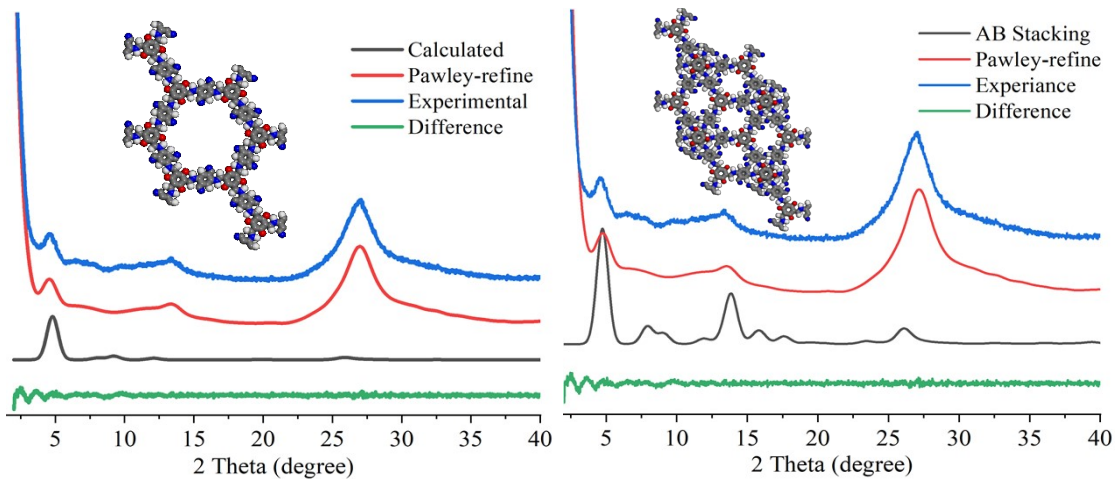

TpPa-CN

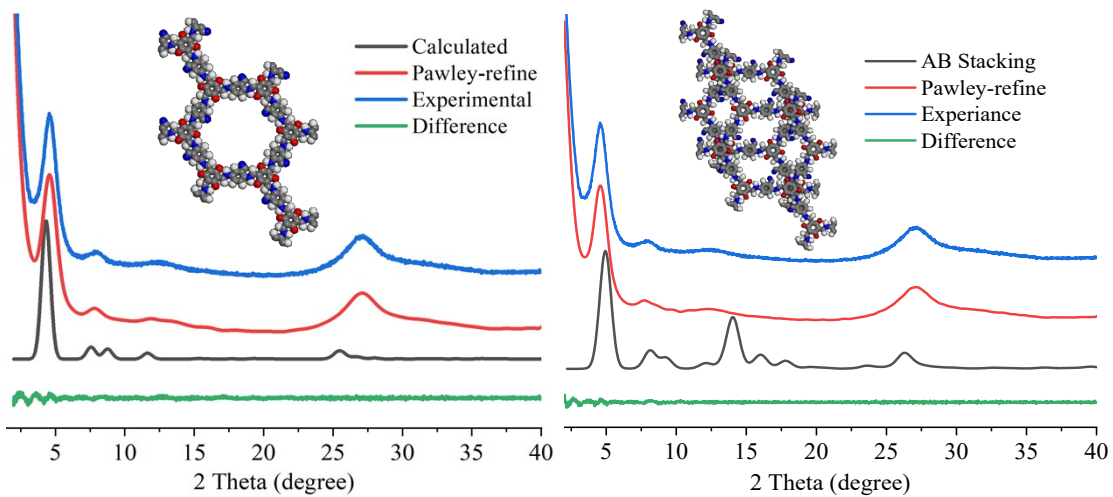

TpPa-(CH<sub>3</sub>)<sub>2</sub>

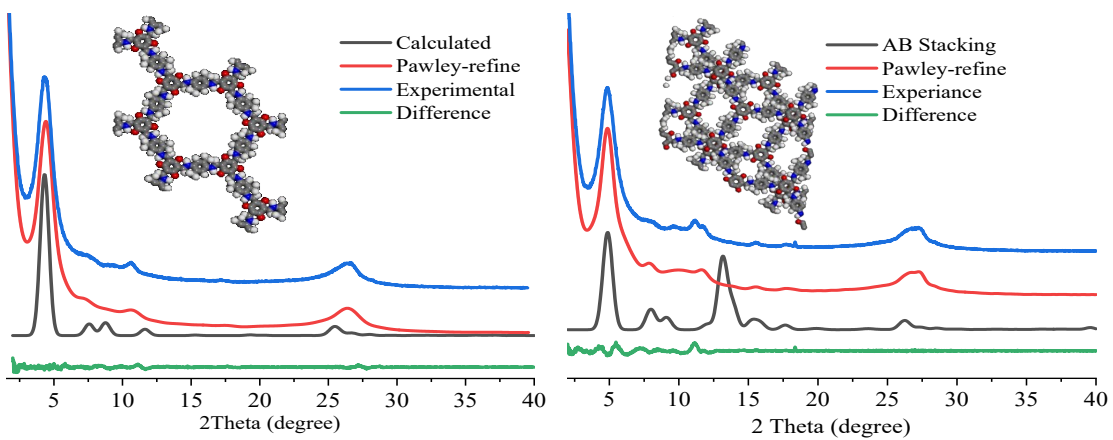

TpPa-CH<sub>3</sub>

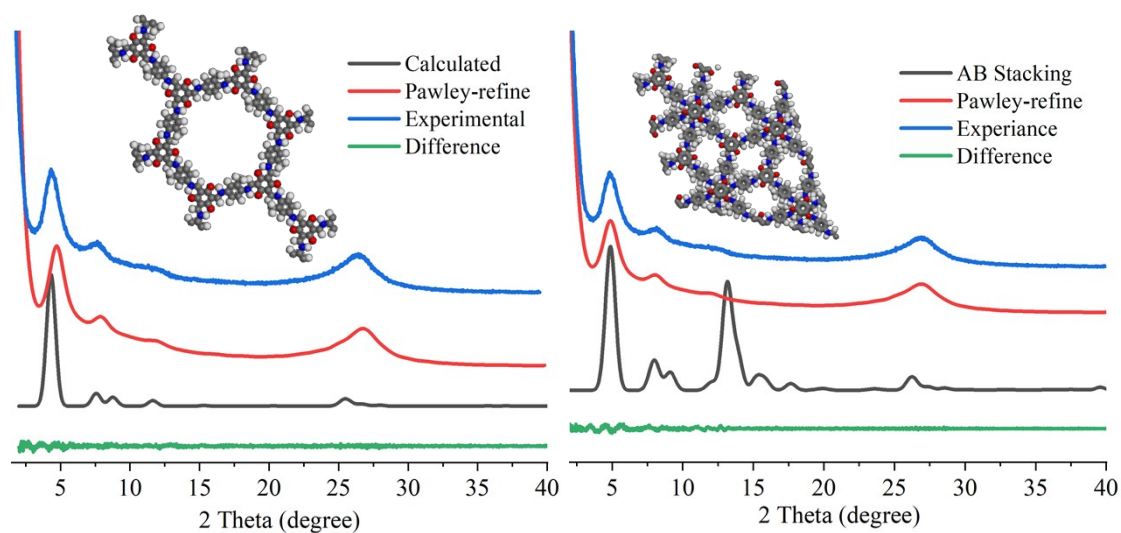

**Figure S1.** Synchrotron PXRD patterns of six COFs.

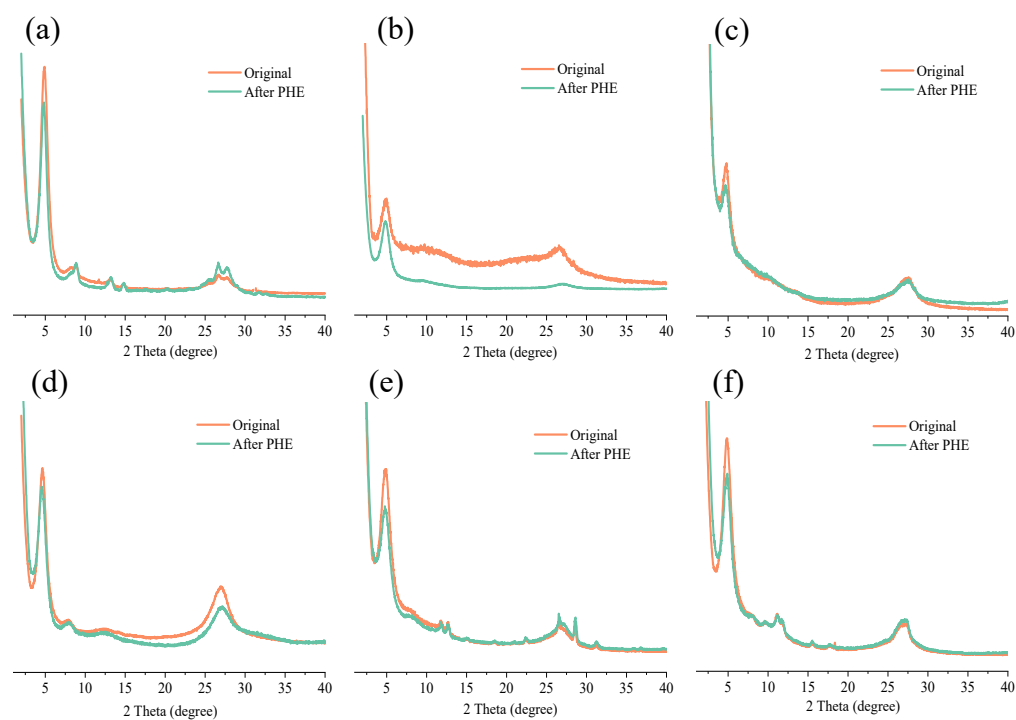

**Figure S2.** Synchrotron PXRD patterns of TpPa-1 (a), TpPa-Cl<sub>2</sub> (b), TpPa-CN<sub>2</sub> (c), TpPa-CN (d) and TpPa-CH<sub>3</sub> (e), TpPa-(CH<sub>3</sub>)<sub>2</sub> (f) before and after photocatalytic hydrogenolysis treatment.

TpPa-1



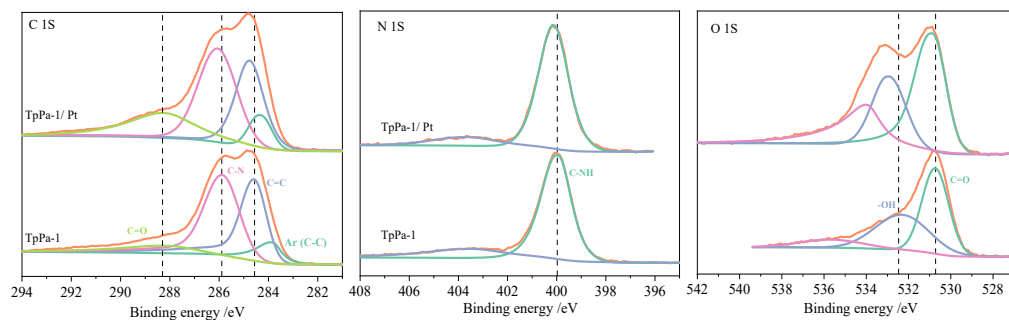

### TpPa-CH<sub>3</sub>

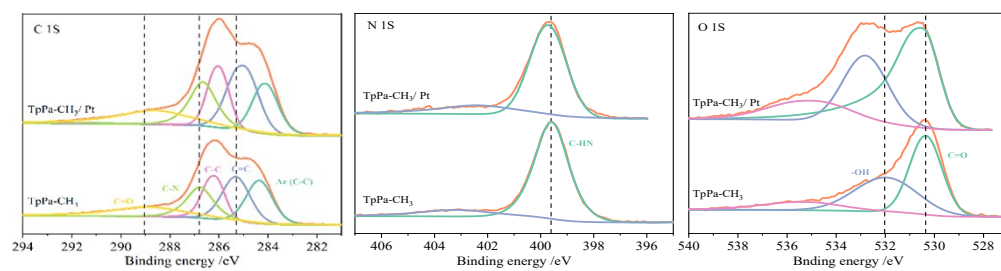

### TpPa-(CH<sub>3</sub>)<sub>2</sub>

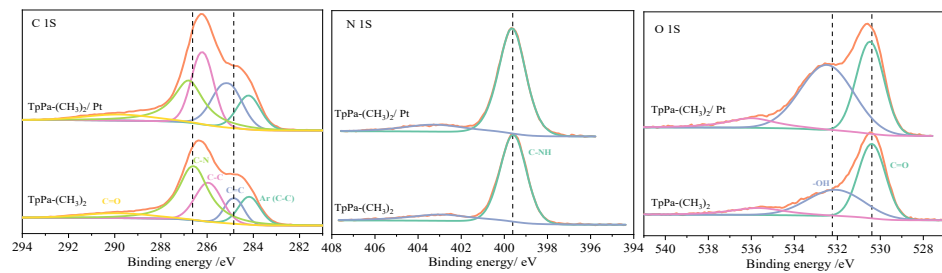

### TpPa-CN<sub>2</sub>

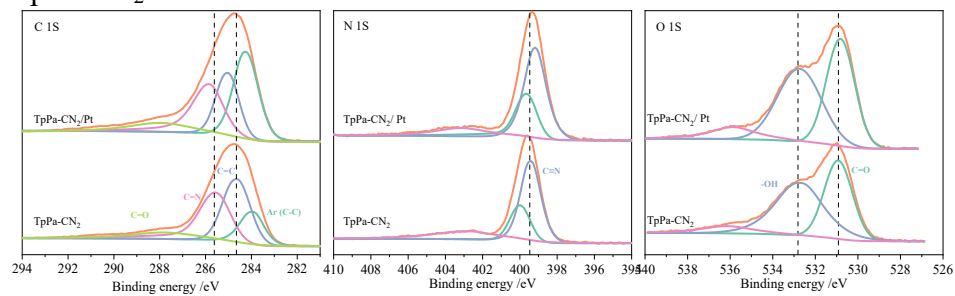

### TpPa-CN

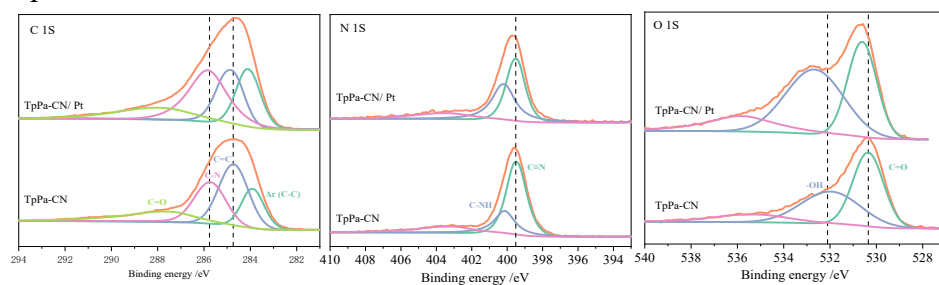

## TpPa-Cl<sub>2</sub>

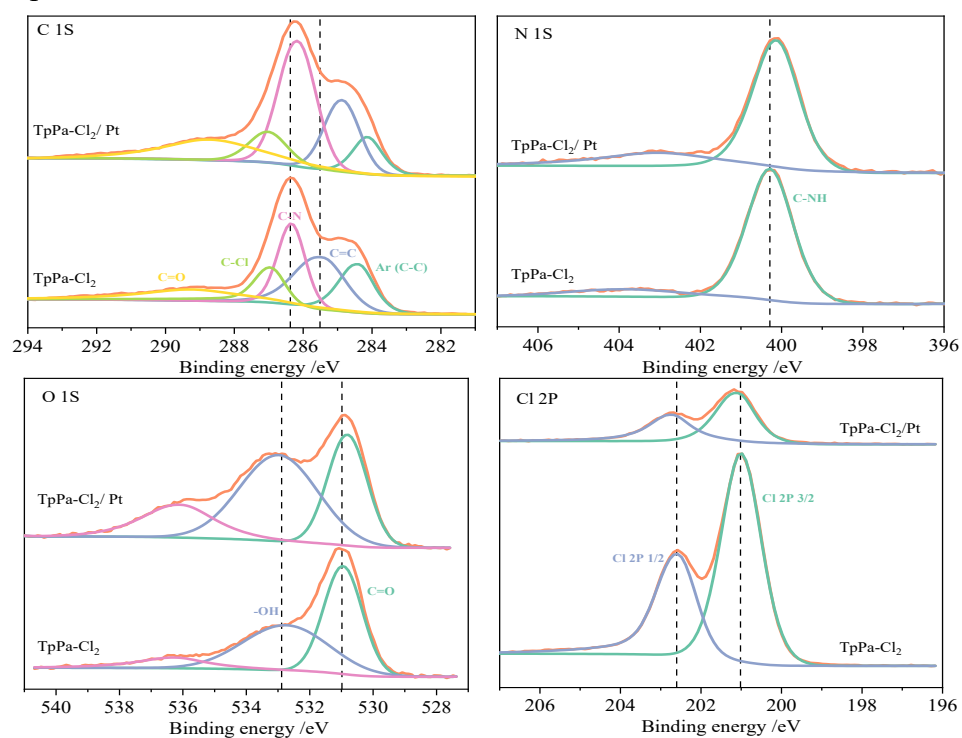

**Figure S3.** XPS changes before and after six COF platinum loads.

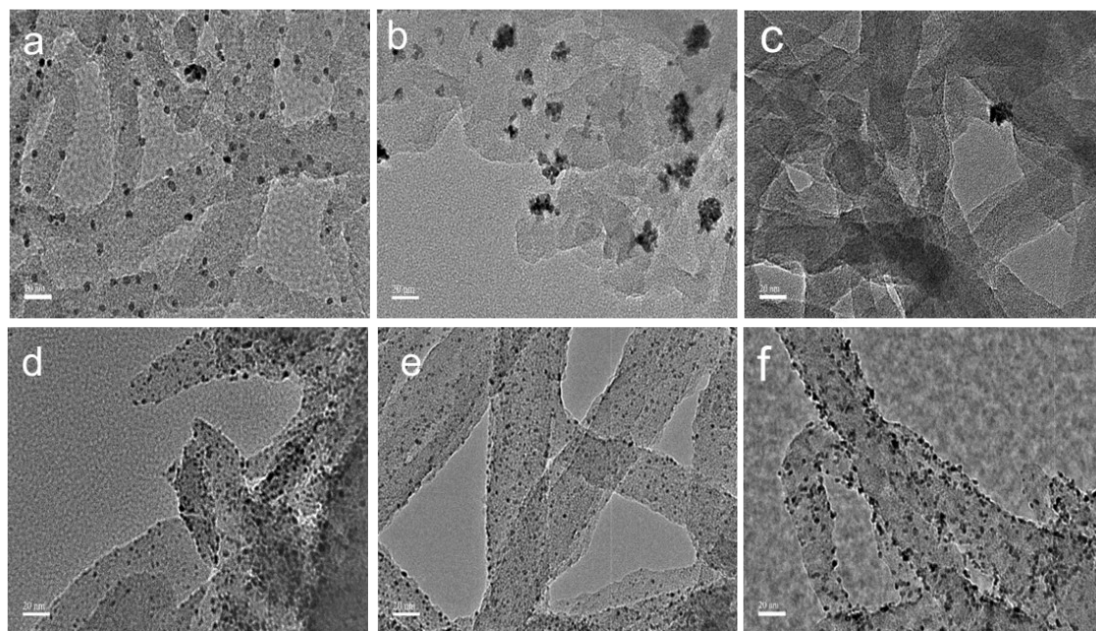

**Figure S4.** a-f is the HR-TEM of TpPa-Cl<sub>2</sub>, TpPa-CN<sub>2</sub>, TpPa-CN, TpPa-1 and TpPa-(CH<sub>3</sub>)<sub>2</sub>, TpPa-CH<sub>3</sub>, respectively.

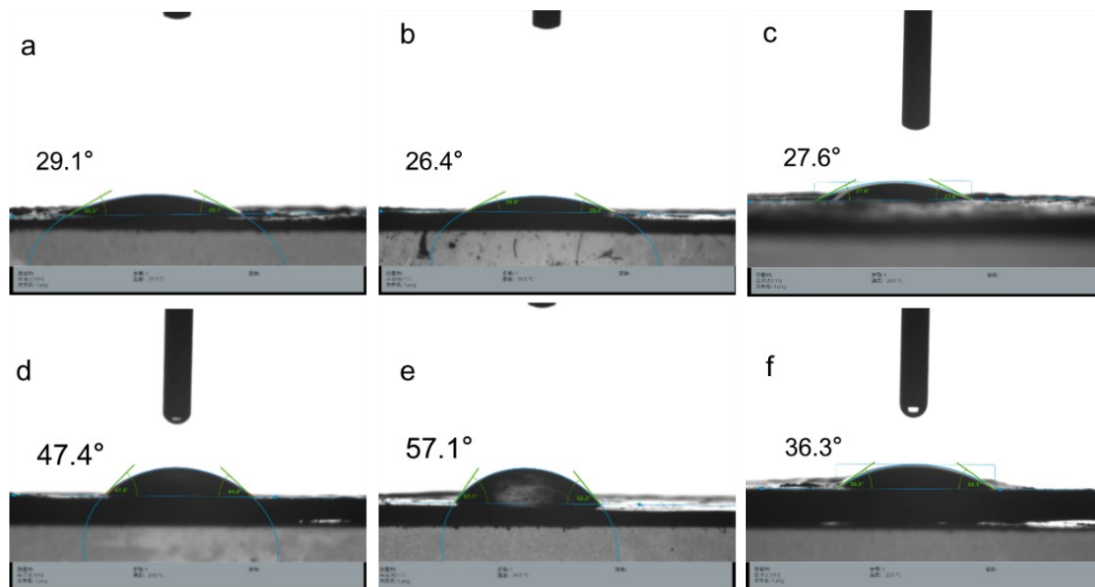

**Figure S5.** a-f is the contact angle of TpPa-Cl<sub>2</sub>, TpPa-CN<sub>2</sub>, TpPa-CN, TpPa-1 and TpPa-(CH<sub>3</sub>)<sub>2</sub>, TpPa-CH<sub>3</sub>, respectively.

## Reference

- [1] Kandambeth S, Mallick A, Lukose B, et al. Construction of Crystalline 2D Covalent Organic Frameworks with Remarkable Chemical (Acid/Base) Stability via a Combined Reversible and Irreversible Route[J]. Journal of the American Chemical Society, 2012, 134(48): 19524-19527.
